# Supplementary material for: Construction of Bouquet-like Bi2Se3/Bi2O3@Bi Composites with High Interfacial Charge Separation for the Degradation of Atrazine
Source: MDPI journal article supplement (doi:10.3390/ma16051896), 2023-02-24
Supplement: s1 [file s1]

## Supporting Information

### Test methods:

To detection of reactive species of the photocatalytic elimination process, several types of scavengers were added into the photocatalytic systems under visiblelight illumination. Add EDTA, IPA, and p-BQ in the reaction system to capture photogenerated holes ( $h^+$ ), hydroxyl radicals ( $\cdot OH$ ), and superoxide radicals ( $\cdot O_2^-$ ) separately. The dosages of all scavengers are 1 mM.

The ATZ concentration of the solution was detected by high-performance liquid chromatography (HPLC). The detection wavelength was 225 nm and the mobile phase is 70% methanol and 30% ultrapure water.

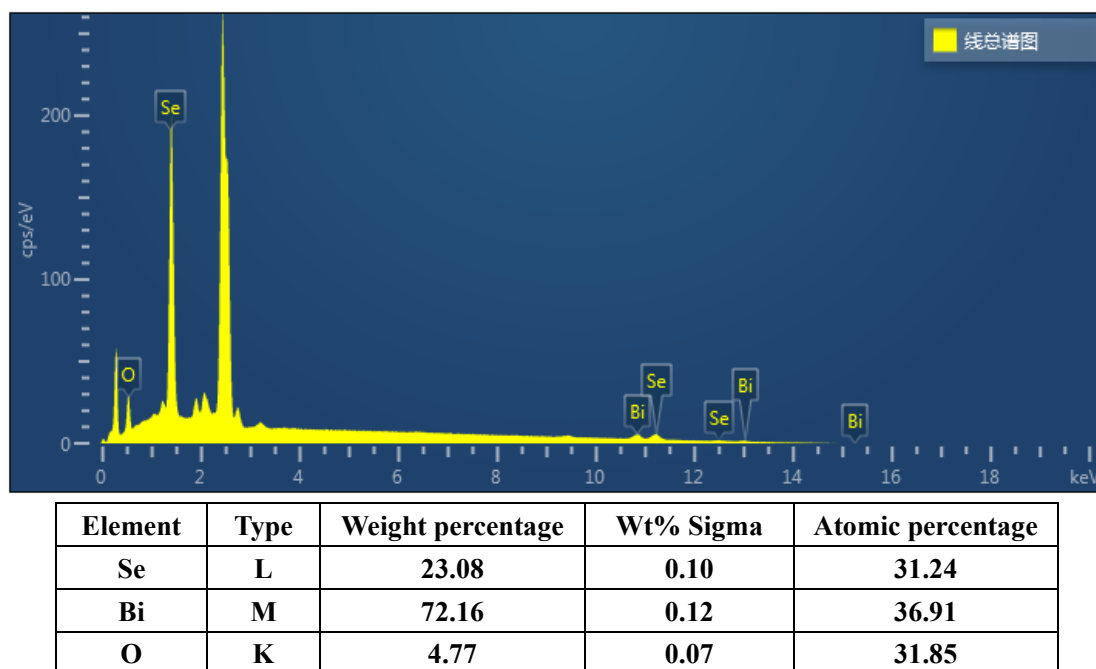

**Fig S1.** EDS spectrum for 2BBOS.

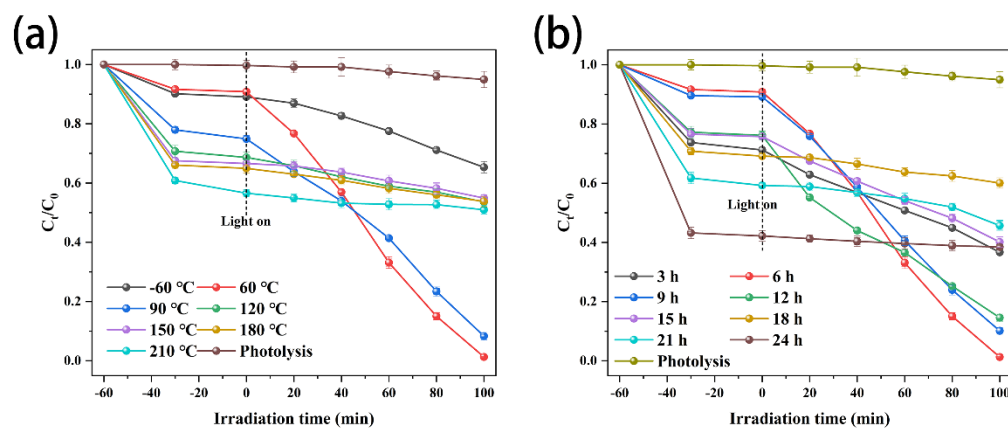

**Fig S2.** (a, b) The photocatalytic performance for different temperature and time.

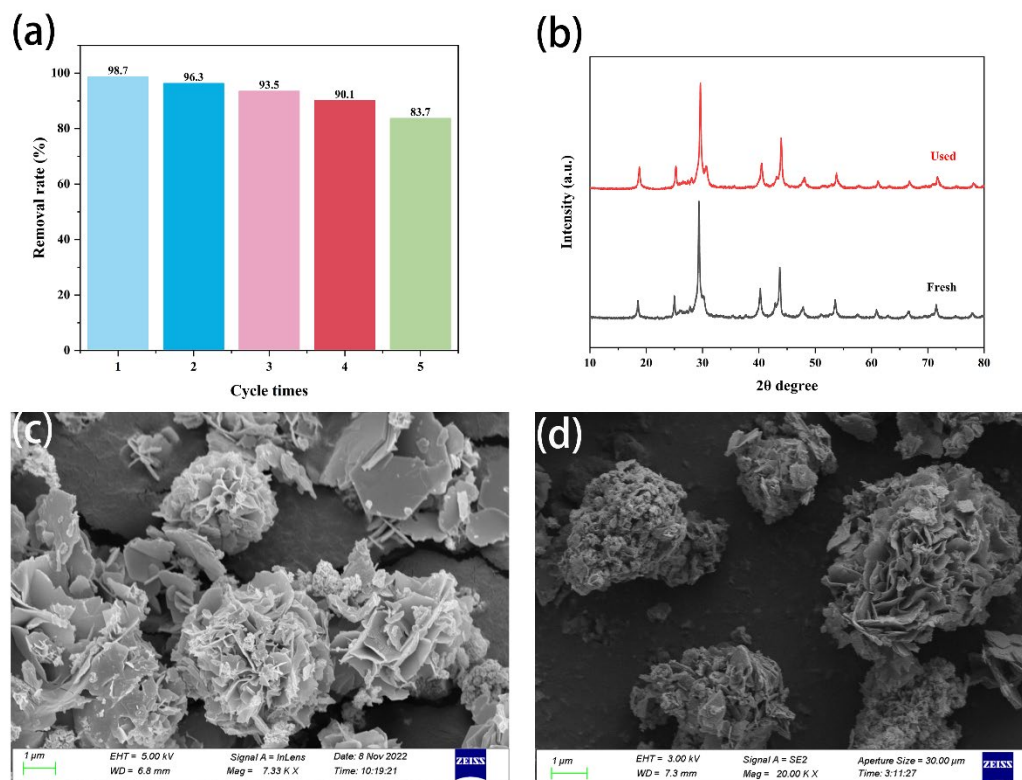

**Fig S3.** (a) photocatalytic stability tests. (b-d) XRD and SEM images of 2BBOS samples before and after use.

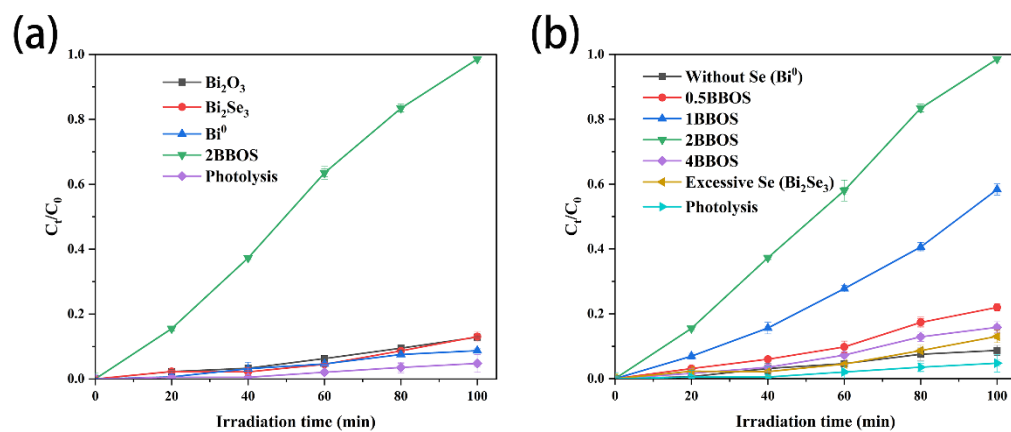

Figure S4. (a, b) The degradation efficiency of ATZ by various photocatalysts.

**Table S1. Comparisons of the photocatalytic performance of several pharmaceuticals on various modified Bi<sub>2</sub>O<sub>3</sub>, Bi<sub>2</sub>Se<sub>3</sub> in recent publications.**

| Pollutants        | Photocatalysts                                        | Reaction conditions       |                                 |                                        | Removal efficiency (%) | Reference (publication time) |
|-------------------|-------------------------------------------------------|---------------------------|---------------------------------|----------------------------------------|------------------------|------------------------------|
|                   |                                                       | Photocatalysts dose (g/L) | Pollutants concentration (mg/L) | Light source (wavelength range)        |                        |                              |
| Rhodamine B (RhB) | Ag/BiO <sub>2-x</sub>                                 | 1                         | 10                              | 300 W Xe lamp ( $\lambda > 420$ nm)    | 58.43                  | [1] (2022)                   |
|                   | BiO <sub>2-x</sub> /BiOI                              | 0.2                       | 10                              | LED lamp                               | 96.4                   | [2] (2021)                   |
|                   | PDI/BiO <sub>2-x</sub>                                | 0.6                       | 5                               | 300 W Xe lamp ( $\lambda > 400$ nm)    | 98.7                   | [3] (2022)                   |
|                   | BiO <sub>2-x</sub> /BiOBr                             | 0.2                       | 10                              | LED lamp                               | 99.8                   | [4] (2021)                   |
|                   | BiO <sub>2-x</sub> /Bi <sub>2</sub> O <sub>2.75</sub> | 1                         | 5                               | 500 W xenon lamp ( $\lambda > 420$ nm) | 93                     | [5] (2019)                   |
|                   | BiOI/BiO <sub>2-x</sub> /BiOBr                        | 0.2                       | 10                              | 30 W LED lamp                          | 99.6                   | [6] (2022)                   |
| Tetracycline (TC) | Y-BiO <sub>2-x</sub>                                  | 0.1                       | 10                              | 300 W xenon lamp ( $\lambda > 420$ nm) | 74.63                  | [7] (2023)                   |
|                   | PDI/BiO <sub>2-x</sub>                                | 0.6                       | 20                              | 300 W Xe lamp ( $\lambda > 400$ nm)    | 64                     | [3] (2022)                   |
|                   | BiO <sub>2-x</sub> /BiOI                              | 0.2                       | 20                              | LED lamp                               | 74.5                   | [2] (2021)                   |
|                   | BiO <sub>2-x</sub> /BiOBr                             | 0.2                       | 20                              | LED lamp                               | 79                     | [4] (2021)                   |
|                   | BiOI/BiO <sub>2-x</sub> /BiOBr                        | 0.2                       | 10                              | 30 W LED lamp                          | 81.0                   | [6] (2022)                   |
|                   | BiO <sub>2-x</sub> /AgBiO <sub>3</sub>                | 1                         | 20                              | 500 W xenon lamp ( $\lambda > 420$ nm) | 94.1                   | [8] (2022)                   |
| Methyl blue       | BiO <sub>2-x</sub> /AgBiO <sub>3</sub>                | 1                         | 20                              | 500 W xenon lamp ( $\lambda > 420$ nm) | 94.5                   | [8] (2022)                   |

|                       |                                                                  |     |    |                                                                          |      |             |
|-----------------------|------------------------------------------------------------------|-----|----|--------------------------------------------------------------------------|------|-------------|
| (MB)                  | PDI/BiO <sub>2-x</sub>                                           | 0.6 | 5  | 300 W Xe lamp ( $\lambda > 400$ nm)                                      | 92   | [3] (2022)  |
|                       | BiO <sub>2-x</sub> /NaBiO <sub>3</sub>                           | 1   | 15 | 500 W xenon lamp ( $\lambda > 420$ nm)                                   | 96.2 | [9] (2019)  |
| Methyl orange<br>(MO) | PDI/BiO <sub>2-x</sub>                                           | 0.6 | 5  | 300 W Xe lamp ( $\lambda > 400$ nm)                                      | 88   | [3] (2022)  |
|                       | BiOCl/BiO <sub>2-x</sub>                                         | 1   | 20 | 500 W xenon lamp ( $\lambda > 240$ nm)                                   | 90   | [10] (2020) |
|                       | BiO <sub>2-x</sub> /AgBiO <sub>3</sub>                           | 1   | 20 | 500 W xenon lamp ( $\lambda > 420$ nm)                                   | 94.1 | [8] (2022)  |
|                       | BiO <sub>2-x</sub> /BiOI                                         | 0.2 | 15 | LED lamp                                                                 | 88.7 | [2] (2021)  |
|                       | BiO <sub>2-x</sub> /NaBiO <sub>3</sub>                           | 1   | 15 | 500 W xenon lamp ( $\lambda > 420$ nm)                                   | 95.7 | [9] (2019)  |
|                       | BiO <sub>2-x</sub> @TiO <sub>2</sub>                             | 1   | 20 | 500 W xenon lamp ( $\lambda > 420$ nm)                                   | 91.2 | [11] (2020) |
| Phenol                | BiO <sub>2-x</sub> /NaBiO <sub>3</sub>                           | 1   | 15 | 500 W xenon lamp ( $\lambda > 420$ nm)                                   | 96.7 | [9] (2019)  |
|                       | BiOCl/BiO <sub>2-x</sub>                                         | 1   | 20 | 500 W xenon lamp ( $\lambda > 240$ nm)                                   | 99.4 | [10] (2020) |
|                       | BiO <sub>2-x</sub> -(BiO) <sub>2</sub> CO <sub>3</sub>           | 1   | 20 | 5W white LED light ( $400 \text{ nm} \leq \lambda \leq 800 \text{ nm}$ ) | 95   | [12] (2019) |
| Bisphenol A           | BiO <sub>2-x</sub> /Bi                                           | 1   | 20 | 500 W metal halogen lamp ( $\lambda > 420$ nm)                           | 83   | [13] (2018) |
| ATZ                   | PK10                                                             | 0.8 | 10 | 300 W Xe lamp                                                            | 83   | [14] (2023) |
|                       | MI-meso-TiO <sub>2</sub>                                         | 1   | 10 | 300 W Xe high-pressure short-arc xenon lamp                              | 88   | [15] (2019) |
|                       | Zn <sub>x</sub> Cu <sub>1-x</sub> Fe <sub>2</sub> O <sub>4</sub> | 1   | 10 | 500 W Xenon lamp                                                         | 95   | [16] (2018) |

3

4

5

## References

- [1] H. Son, Y. Kim, Near-infrared driven photocatalyst ( $\text{Ag/BiO}_{2-x}$ ) with post-illumination catalytic memory, *Journal of Physics and Chemistry of Solids* 167 (2022) 110781.
- [2] L. Huang, J. Liu, Y. Li, L. Yang, C. Wang, Enhancement of photocatalytic activity of Z-scheme  $\text{BiO}_{2-x}/\text{BiOI}$  heterojunction through vacancy engineering, *Applied Surface Science* 555 (2021) 149665.
- [3] X. Zhang, L. Shi, Y. Zhang, Preparation of organic-inorganic PDI/ $\text{BiO}_{2-x}$  photocatalyst with boosted photocatalytic performance, *Journal of the Taiwan Institute of Chemical Engineers* 132 (2022) 104111.
- [4] J. Liu, L. Huang, Y. Li, L. Yang, C. Wang, J. Liu, Y. Song, M. Yang, H. Li, Construction of oxygen vacancy assisted Z-scheme  $\text{BiO}_{2-x}/\text{BiOBr}$  heterojunction for LED light pollutants degradation and bacteria inactivation, *J Colloid Interface Sci*, 600 (2021) 344-357.
- [5] M. Wang, G. Tan, D. Zhang, B. Li, L. Lv, Defect-mediated Z-scheme  $\text{BiO}_{2-x}/\text{Bi}_2\text{O}_{7.75}$  photocatalyst for full spectrum solar-driven organic dyes degradation, *Applied Catalysis B: Environmental* 254 (2019) 98–112.
- [6] J. Liu, L. Huang, Y. Li, L. Yang, C. Wang, Fabrication oxygen defect-mediated double Z-scheme  $\text{BiOI/BiO}_{2-x}/\text{BiOBr}$  photocatalyst for pollutions degradation and bacteria inactivation, *Journal of Environmental Chemical Engineering* 10 (2022) 106668.
- [7] Y. Zhou, Q. Li, J. Zhang, M. Xiang, Y. Zhou, Broad spectrum driven Y doped  $\text{BiO}_{2-x}$  for enhanced degradation of tetracycline: Synergy between singlet oxygen and free radicals, *Applied Surface Science* 607 (2023) 154957.
- [8] Y. Chen, Z. Han, Z. Liu, Z. Liu, P. Feng, Fabrication of flower-like  $\text{BiO}_{2-x}/\text{AgBiO}_3$  photocatalysts with excellent visible light driven photocatalytic degradation, *Journal of Physics and Chemistry of Solids* 165 (2022) 110692.
- [9] J. Wang, Z. Liu, Z. Liu,  $\text{BiO}_{2-x}/\text{NaBiO}_3$  hybrid composites: Facile synthesis, enhanced photocatalytic activity and mechanism, *Solid State Sciences*, 95 (2019) 105935.
- [10] Z. Liu, J. Wang, Face-to-face  $\text{BiOCl/BiO}_{2-x}$  heterojunction composites with highly efficient charge separation and photocatalytic activity, *Journal of Alloys and Compounds* 832 (2020) 153771.
- [11] Z. Liu, J. Xu, Fabrication of  $\text{BiO}_{2-x}@\text{TiO}_2$  heterostructures with enhanced photocatalytic activity and stability, *Applied Surface Science* 511 (2020) 145460.
- [12] Y. Jia, T. Zhao, D. Liu, H. Han, J. Gao, Hydrothermal synthesis of  $\text{BiO}_{2-x}-(\text{BiO})_2\text{CO}_3$  composite and their photocatalytic performance with visible light radiation, *Materials Letters* 238 (2019) 281–285.
- [13] H. Ma, Y. Zhao, B. Souvanthong, J. Zhao, Time-dependent synthesis of  $\text{BiO}_{2-x}/\text{Bi}$  composites with efficient visible-light induced photocatalytic activity, *J Colloid Interface Sci*, 531 (2018) 311-319.
- [14] Y. Deng, Z. Zhou, H. Zeng, R. Tang, L. Li, J. Wang, C. Feng, D. Gong, L. Tang, Y. Huang, Phosphorus and kalium co-doped g-C<sub>3</sub>N<sub>4</sub> with multiple-locus synergies to degrade atrazine: Insights into the depth analysis of the generation and role of singlet oxygen, *Applied Catalysis B: Environmental*, 320 (2023) 121942.
- [15] H. Shi, Y. Wang, C. Tang, W. Wang, M. Liu, G. Zhao, Mechanisim investigation on the enhanced and selective photoelectrochemical oxidation of atrazine on molecular imprinted mesoporous  $\text{TiO}_2$ , *Applied Catalysis B: Environmental*, 246 (2019) 50-60.
- [16] Y. Huang, C. Han, Y. Liu, M.N. Nadagouda, L. Machala, K.E. O'Shea, V.K. Sharma, D.D. Dionysiou, Degradation of atrazine by  $\text{ZnxCu}_{1-x}\text{Fe}_2\text{O}_4$  nanomaterial-catalyzed sulfite under UV-vis light irradiation: Green strategy to generate  $\text{SO}_4^-$ , *Applied Catalysis B: Environmental*, 221 (2018) 380-392.
